# Supplementary material for: Biotransformation of Benzoate to 2,4,6-Trihydroxybenzophenone by Engineered Escherichia coli
Source: MDPI journal article supplement (doi:10.3390/molecules26092779), 2021-05-08
Supplement: s1 [file s1]

## Supplementary Materials

# Biotransformation of Benzoate to 2,4,6-Trihydroxybenzophenone by Engineered *Escherichia coli*

Anuwatthakij Klamrak <sup>1</sup>, Jaran Nabnueangsap <sup>2</sup> and Natsajee Nualkaew <sup>1</sup>

<sup>1</sup> Faculty of Pharmaceutical Sciences, Khon Kaen University, Khon Kaen 40002, Thailand; anuwat\_kla@yahoo.com (A.K); nnatsa@kku.ac.th (N.N)

<sup>2</sup> Salaya Central Instrument Facility RSPG, Mahidol University, Nakhon Pathom 73170, Thailand; jaran.nab@mahidol.ac.th

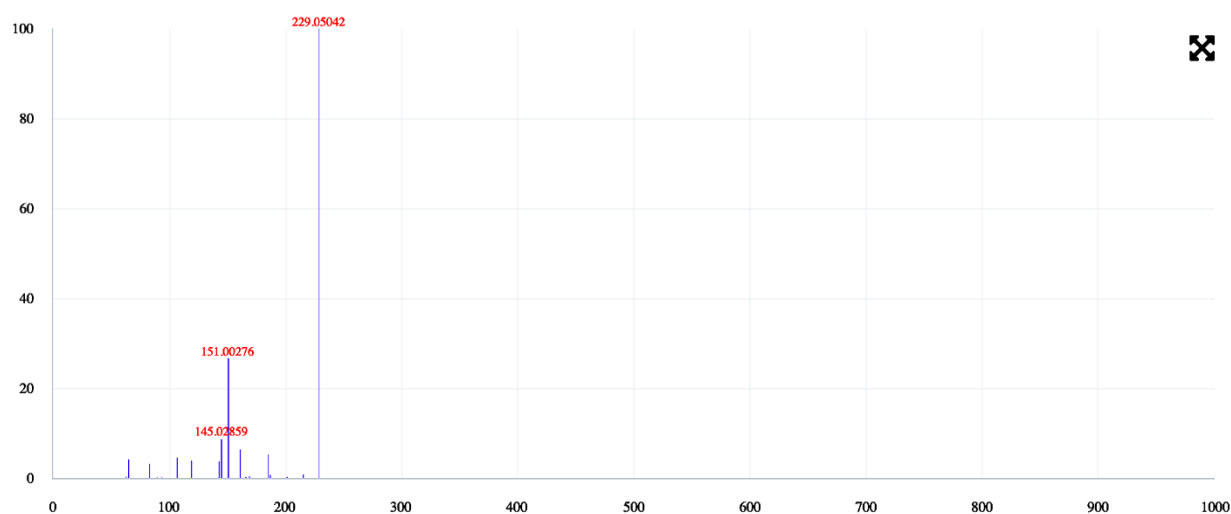

Figure S1. The MS/MS spectra of 2,4,6-TriHB(-) reported in PubChem database.

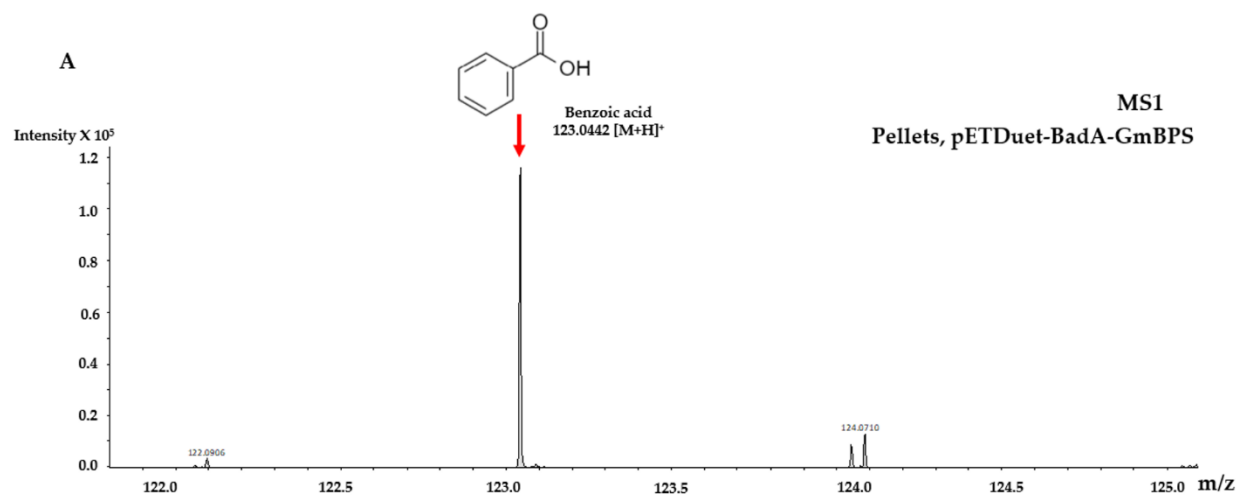

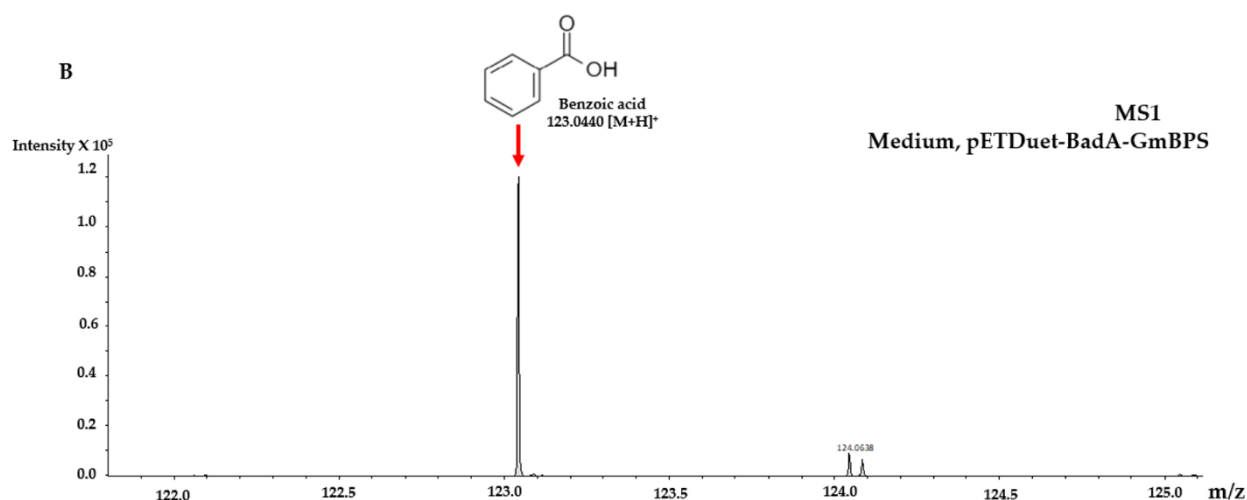

**Figure S2.** The EICs for the putative benzoic acid (calc. 123.044605 [M+H]<sup>+</sup>) detected both from pellets (A) and medium (B) of clones harbored pETDuet-BadA-GmBPS.

```
>L42322.1:19-1584 Rhodopseudomonas palustris benzoate-coenzyme A ligase
(badA) gene, complete cds
ATGAATGCAGCCGCGGTACGCCGCCACCCGAGAAGTTTAATTTTGCCGAGCACCTGCTGCAGACCAATC
GCGTGCGGCCGACAAAGACGGCGTTCGTGACGACATCTCGTCGCTGAGCTTCGCGCAACTCGAAGCTCA
GACGCGTCAGCTCGCCGCCGCTTACGCGCGATCGGGGTGAAACGCGAAGAGCGCGTGCTGCTGCTGATG
CTCGACGGCACGGATTGGCCGGTGGCGTTTCTCGGCGCAATCTACGCCGGCATCGTGCCGGTTCGCGGTCA
ATACGCTGCTGACGGCGGACGACTACGCCTACATGCTCGAGCATTCGCGGGCTCAGGCCGTGCTGGTCAG
CGGCGCGCTGCACCCGGTGCTCAAGGCAGCGCTGACCAAGAGCGATCACGAGGTGCAGCGAGTGATCGTT
TCGCGCCCCAGCGCTCCGCTGGAGCCGGGCGAGGTGCGACTTCGCTGAGTCGGCGCACATCGCTTGAGAAGC
CTGCCGCTACGCAAGCGGACGATCCGGCGTTCTGGCTGTATTCTCGTGGGTTCTACCGGGCGGCCGAAGGG
CGTGCTGCACACTCACGCCAATCCGTACTGGACCTCGGAGCTGTACGGCCGCAACACGCTGCATCTGCGC
GAAGACGACGTCTGCTTTTCGGCGGCCAAACTGTTTTCTCGCTTACGGCCTCGGCAACGCGCTGACGTTTC
CGATGACGGTCGGCGCGACCACGCTGCTGATGGGCGAGCGACCGACGCCGGACGCGGTGTTCAAGCGCTG
GCTCGGCGGCGTTCGGCGGTGTGAAACCGACCGTGTTCTACGGCGCGCCACCGGCTACGCCGGCATGTTG
GCCGCGCCGAACCTGCCGTCGCGCGACAGGTGGCGTTGCGGCTCGCGTCGTCGGCGGGCGAAGCACTGC
CGGCGGAGATTGGGCAGCGCTTCCAGCGCCATTTCCGGCCTCGACATCGTCGATGGCATCGGCTCGACCGA
GATGCTGCACATCTTTCTGTGCAACCTGCCAGACCGGGTGCGCTACGGCACCAACCGGATGGCCGGTGCCG
GGCTATCAGATCGAGCTGCGCGGCGACGGCGGCGACCGGTGCGCGACGAGAGCCGGGCGATCTCTACA
TTCACGGCCCCGTATCGGCGACGATGTATTGGGGCAACCGGGCCAAGAGCCGCGACACCTTCCAGGGCGG
CTGGACCAAGAGCGGCGACAAATACGTCCGCAACGACGACGGCTCCTACACCTATGCGGGCCGACCGAC
GACATGCTGAAGGTCAGCGGCATCTATGTCAGCCCGTTTCGAGATCGAAGCGACGCTGGTGCAGCATCCCG
GTGTGCTCGAAGCCGAGTGGTTCGGGGTCGCCGACGAACACGGCCTGACCAACCGAAGGCCTATGTGGT
GCCGCGGCCCGGCCAGACCCTGTCGGAGACCGAGCTGAAGACCTTCATCAAGGATCGACTGGCGCCGTAC
AAATATCCGCGCAGCACGGTGTTCGTCGCCGAATTGCCGAAGACGGCGACCGGCAAGATTACGCGCTTCA
AGCTGCGCGAGGGTGTGTTGGGCTGA
```

**Figure S3.** The *Xho*I recognition site\* detected in the BadA coding sequence. \* The restriction site was analysed by NEBcutter V2.0 (<http://nc2.neb.com/NEBcutter2/>).

GGGGAATTGATCGCGAATTAATACGACTCACTATAGGGGAATTGTGAGCGGATAACAATTCCCCTCTAGAAATAATT  
TTGTTTAACTTTAAGA**AAGGAG**ATATACCATGGGCAGCAGCCAT**CACCATCATCACCACAGCCAGGATCCTATGA**ATG
RBS 6XHIS BamHI Start codon

CAGCCGCGGTACGCCGCCACCCGAGAAGTTTAATTTTGCCGAGCACCTGCTGCAGACCAATCGCGTGC GGCCCGGAC  
AAGACGGCGTTTCGTCGACGACATCTCGTCGCTGAGCTTCGCGCAACTCGAAGCTCAGACGCGTCAGCTCGCCGCCGC  
CTTACGCGCGATCGGGGTGAAACGCGAAGAGCGCGTGCTGCTGCTGATGCTCGACGGCACGGATTGGCCGGTGGCGT  
TTCTCGGCGCAATCTACGCCGGCATCGTGCCGGTCGCGGTCAATACGCTGCTGACGGCGGACGACTACGCCTACATG  
CTCGAGCATTCGCGGGCTCAGGCCGTGCTGGTCAGCGGCGCGCTGCACCCGGTGCTCAAGGCAGCGCTGACCAAGAG  
CGATCACGAGGTGCAGCGAGTGATCGTTTCGCGCCCAGCGCTCCGCTGGAGCCGGGCGAGGTCGACTTCGCTGAGTC  
GGCGCACATCGCTTGAGAAGCCTGCCGCTACGCAAGCGGACGATCCGGCGTTCTGGCTGTATTTCGTCGGGTTCTACC  
GGGCGGCCGAAGGGCGTGGTGCACTCACGCCAATCCGTA CTGGACCTCGGAGCTGTACGGCCGCAACACGCTGCA  
TCTGCGCGAAGACGACGTCTGCTTTTCGGCGGCCAACTGTTTTTCGCTTACGGCCTCGGCAACGCGCTGACGTTTC  
CGATGACGGTCGGCGCGACCACGCTGCTGATGGGCGAGCGACCGACGCCGGACGCGGTGTTCAAGCGCTGGCTCGGC  
GGCGTCGGCGGTGTGAAACCGACCGTGTTCTACGGCGCGCCACCGGCTACGCCGGCATGTTGGCCGCGCCGAACCT  
GCCGTCGCGCGACCAGGTGGCGTTGCGGCTCGCGTCGTCGGCGGGCGAAGCACTGCCGGCGGAGATTGGGCAGCGCT  
TCCAGCGCCATTTTCGGCCTCGACATCGTCGATGGCATCGGCTCGACCGAGATGCTGCACATCTTTCTGTGGAACCTG  
CCAGACCGGGTGCGCTACGGCACCAACGGATGGCCGGTGCCGGGCTATCAGATCGAGCTGCGCGGCGACGGCGGGCGG  
ACCGGTCGCCGACGGAGAGCCGGGCGATCTCTACATTACGGCCCCGTCATCGGCGACGATGTATTGGGGCAACCGGG  
CCAAGAGCCGCGACACCTTCCAGGGCGGCTGGACCAAGAGCGGCGACAAATACGTCCGCAACGACGACGGCTCCTAC  
ACCTATGCGGGCCGCACCGACGACATGCTGAAGGTCAGCGGCATCTATGTAGCCCGTTTCGAGATCGAAGCGACGCT  
GGTGACGATCCCGGTGTGCTCGAAGCCGAGTGGTCGGGGTCGCCGACGAACACGGCCTGACCAAACCGAAGGCCT  
ATGTGGTGCCGCGGCCCCGGCCAGACCCTGTCGGAGACCGAGCTGAAGACCTTCATCAAGGATCGACTGGCGCCGTAC  
AAATATCCGCGCAGCACGGTGTTTCGTCGCCGAATTGCCGAAGACGGCGACCGGCAAGATTCAGCGCTTCAAGCTGCG  
CGAGGGTGTTGGGCTGA**GCGGCCG**CATAATGCTAAGCGACAGAAATTGCC
Stop codon NotI

**Figure S4.** The insertion of BadA in MCS-1 region of pETDuet-1 vector.

AGGGAACTACTATAGGGGATTGTGAGCGGATAACAATTCCCCATCTTAGTATATTAGTTAAGTATAAG**AAGGAGAT**  
**Start codon**  
 ATA**CATATG**GCACCTGCAATGGATTCTGCCCCAAAATGGCCACCAAAGCCGAGGTTCTGCCAATGTTCTAGCAATTGG  
*NdeI*  
 CACTGCAAAATCCACCAAACGTCATTCTGCAAGAAGACTATCCTGATTTTTACTTTAAAGTCACAAATAGCGAGCATT  
 TAACTGACTTGAAAGAAAAATTTAAGCGTATATGTGTTAAATCAAAAACCAGGAAGAGGCATTTTTATCTAACAGAG  
 CAAATCCTTAAAGAGAAACCCAGGCATTGCAACCTATGGAGCAGGATCTCTCGACTCTCGTCAAAAGATTCTCGAAAC  
 GGAGATTCCCTAAGCTCGGAAAAGAGGCTGCAATGGTAGCCATCCAAGAAATGGGGACAACCAGTGTGAAAATCACCC  
 ACGTTGTATTGCGCACCACTTCAGGCTTTATGATGCCCGGAGCTGACTACTCAATCACCAGGCTTCTCGGCCATAAT  
 CCCAATGTAAGGCGCGTAATGATCTATAACCAAGGATGCTTTGCTGGTGGCACGGCCCTTCGTGTTGCCAAGGACCT  
 TGCAGAGAACAACAAGGGTGCTCGTGTCTTGTAGTTTGCCTGAGAACACAGCCATGACCTTCCACGGACCTAATG  
 AGAATCATTTAGATGTGTTGGTTGGTCAGGCTATGTTCTCTGATGGCGCGGCTGCTTTGATCATTGGAGCCAACCCC  
 AATTTACCAGAGGAACGTCCAGTTTATGAGATGGTAGCAGCCCATCAAACCATTGTCCCTGAGTCGGATGGGGCGAT  
 AGTTGCGCATTTTTATGAGATGGGAATGAGTTACTTCCTCAAAGAGAATGTTATTCCTCTTTTTGGCAACAACATTG  
 AGGCTTGCATGGAGGCCGCATTTAAGGAATATGGAATTAGTGAAGTGGAACTCCTTGTCTATTCTGTGCATCCTGGT  
 GGCCGGGCTATCGTTGATGGAATCGCAGAGAAGTTGGGTCTTGATGAAGAAAACCTCAAGGCAACAAGGCACGTTTT  
 GAGTGAATATGGGAATATGGGTTCTGCTTGTGTCATCTTTATCCTCGATGAGCTGAGGAAGAAATCCAAAGAGGAGA  
 AGAAGCTCACCACTGGAGATGGAAAGGAGTGGGGTTGCCTTATTGGATTAGGCCCGGGACTCACCGTGGAGACCGTC  
 GTACTTCGTAGTGTGCCAATAGCA**CTCGAG**TCTGGT**AAAGAAACCGCTGCTGCGAAATTTGAACGCCAGCACATGGA**  
*XhoI* S-Tag  
**CTCGT**CTACTAGCGCAGCTTTATTTCCCTTTCCCCCT

**Figure S5.** The insertion of GmBPS in MCS-2 region of pETDuet-1 vector.

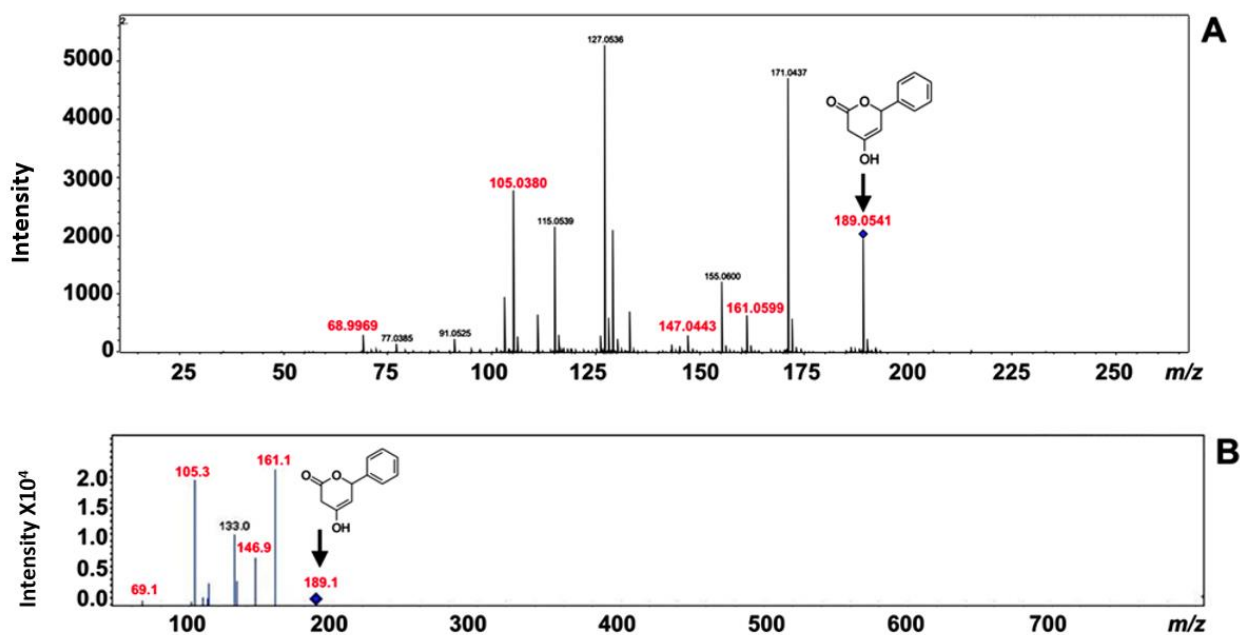

**Figure S6.** The MS/MS spectra of triketide lactone. (A) The MS/MS spectra of triketide lactone obtained from the enzymatic reaction of GmBPS reported in this study; (B) The MS/MS spectra of triketide lactone reported by Nualkaew et al. 2012 [12].

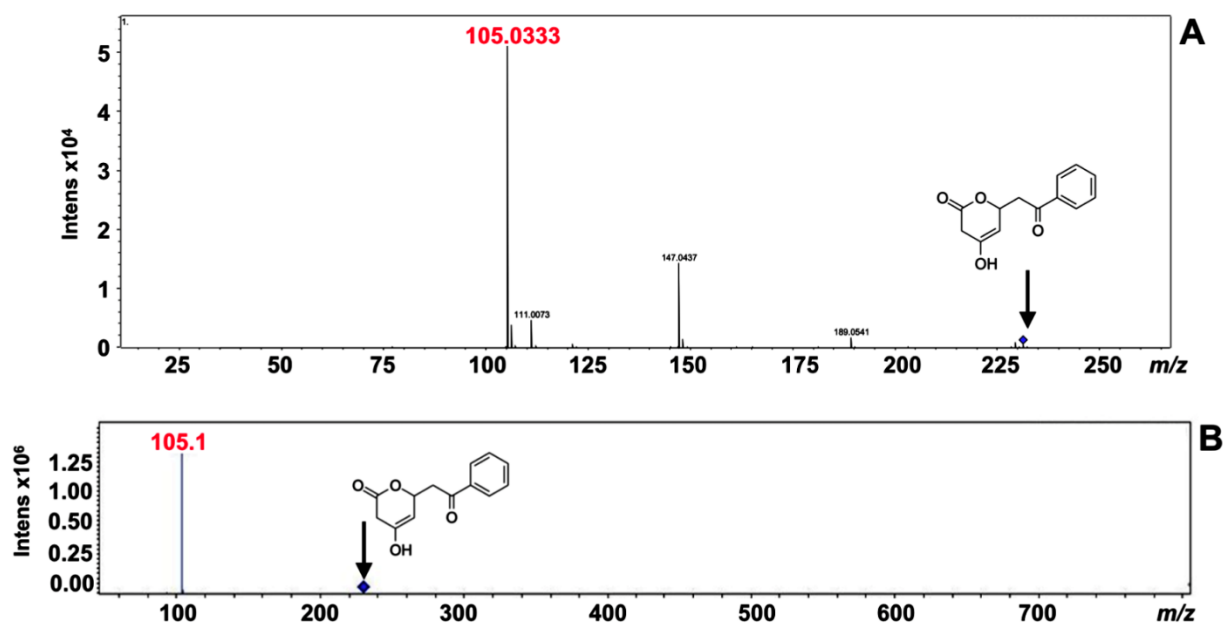

**Figure S7.** The MS/MS spectra of tetraketide lactone. (A) The MS/MS spectra of tetraketide lactone obtained from the enzymatic reaction of GmBPS reported in this study; (B) The MS/MS spectra of tetraketide lactone reported by Nualkaew et al. 2012 [12].

| <b>m/z</b> | <b>Intensity</b> |
|------------|------------------|
| 105.0335   | 1809             |
| 153.0179   | 12899            |
| 231.0646   | 3009             |

**Figure S8.** The raw mass data of 2,4,6-TriHB measured by positive ion mode LC-MS/MS.

| <b>m/z</b> | <b>Intensity</b> |
|------------|------------------|
| 145.0288   | 17212            |
| 151.0033   | 7548             |
| 161.0604   | 1480             |
| 185.0597   | 788              |
| 229.0496   | 788              |

**Figure S9.** The raw mass data of 2,4,6-TriHB measured by negative ion mode LC-MS/MS.
